# Supplementary material for: Magnetic nanoparticle loaded biodegradable vascular stents for magnetic resonance imaging and long-term visualization
Source: Royal Society of Chemistry journal article supplement (doi:10.1039/d3tb00185g), 2023-01-01
Supplement: d3tb00185g1.pdf [file d3tb00185g1.pdf]

## Supporting Information

### **Magnetic Nanoparticle Loaded Biodegradable Vascular Stents for Magnetic Resonance Imaging and Long-Term Visualization**

Mingxi Li,<sup>a,b</sup> Dongwen Deng,<sup>b</sup> Zhe Chen,<sup>a</sup> Wentao Liu,<sup>b</sup> Gutian Zhao,<sup>b</sup> Yu Zhang,<sup>a</sup> Fang Yang <sup>\*a</sup>  
and Zhonghua Ni <sup>\*b</sup>

<sup>a</sup>State Key Laboratory of Bioelectronics, Jiangsu Key Laboratory for Biomaterials and Devices, School of Biological Sciences and Medical Engineering, Southeast University, Nanjing 210096, P. R. China

<sup>b</sup>Jiangsu Key Laboratory for Design and Manufacture of Micro-Nano Biomedical Instruments, School of Mechanical Engineering, Southeast University, Nanjing 211189, China

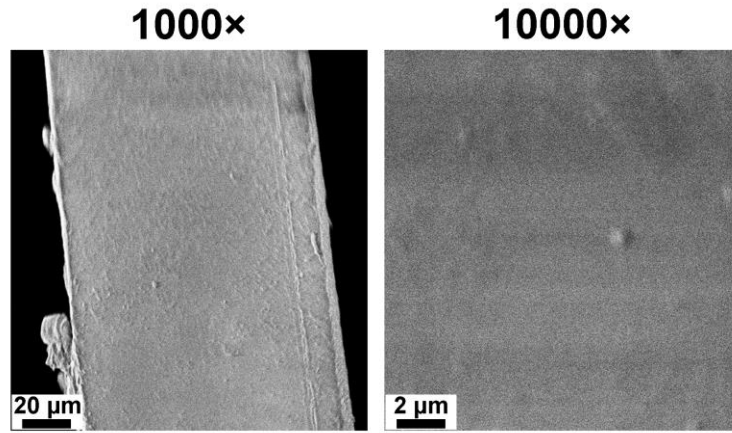

**Fig. S1** SEM image of the surface morphology of the unsprayed stent.

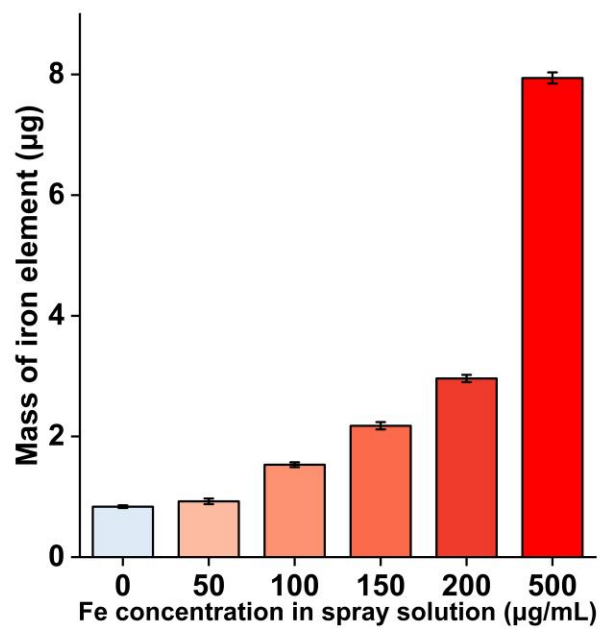

**Fig. S2** Fe element mass in coatings of SPION-BDS with intact concentration gradient.

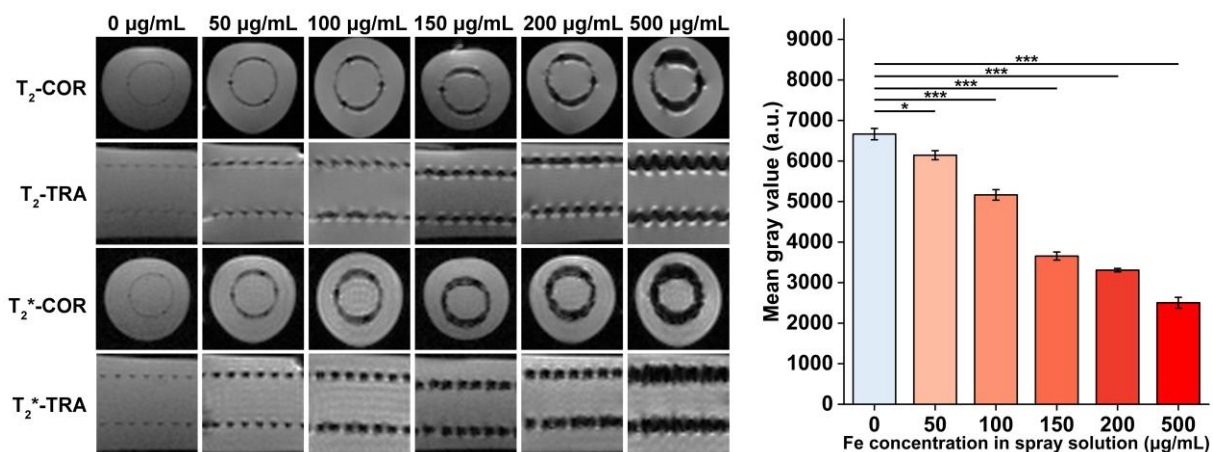

**Fig. S3** T<sub>2</sub>-weighted MR images of SPION-BDS with intact concentration gradient (a) and quantitative analysis of gray value in SPION-BDS region of T<sub>2</sub>\* images (b). Error bars: mean ± standard deviation (SD) (n = 3). \*P < 0.05, \*\*P < 0.01, and \*\*\*P < 0.001 (two-tailed Student's t-test).

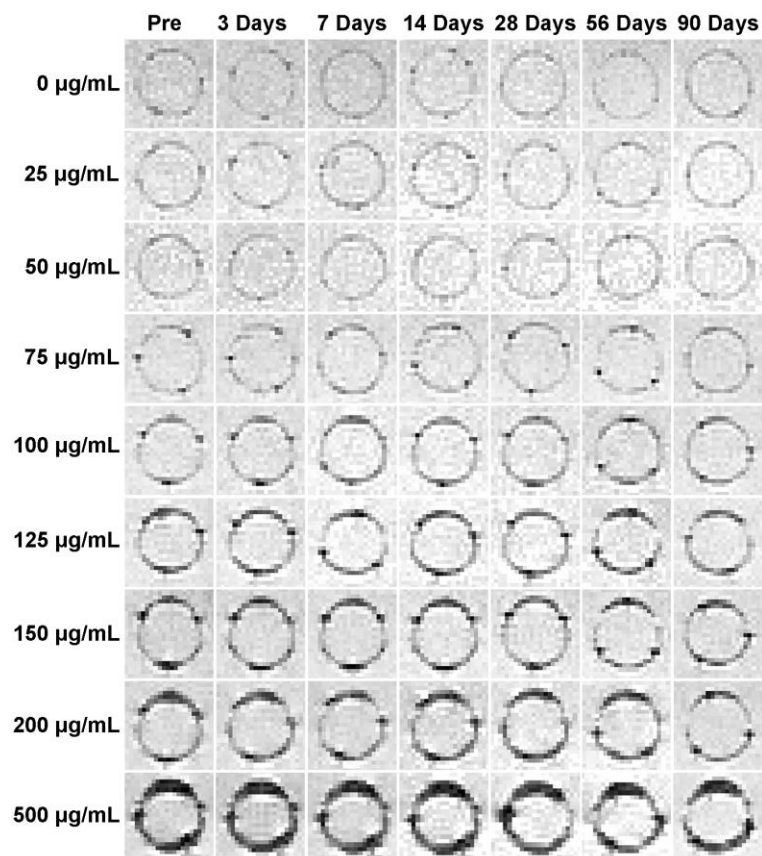

**Fig. S4** MR imaging monitoring of the degradation of SPION-BDS with intact concentration gradient.

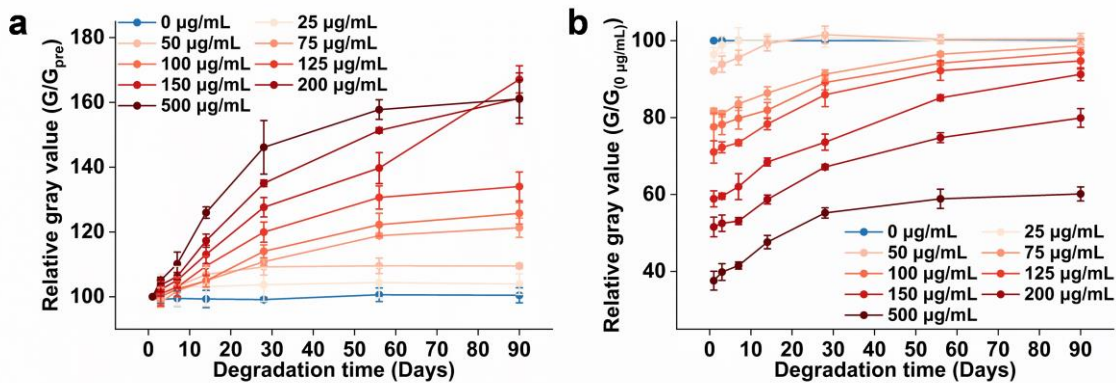

**Fig. S5** (a) Normalized quantitative analysis of SPION-BDS gray value of the intact concentration gradient with degradation time. (b) Normalized quantitative analysis of the gray value ratio of the intact concentration gradient SPION-BDS to the blank BDS.

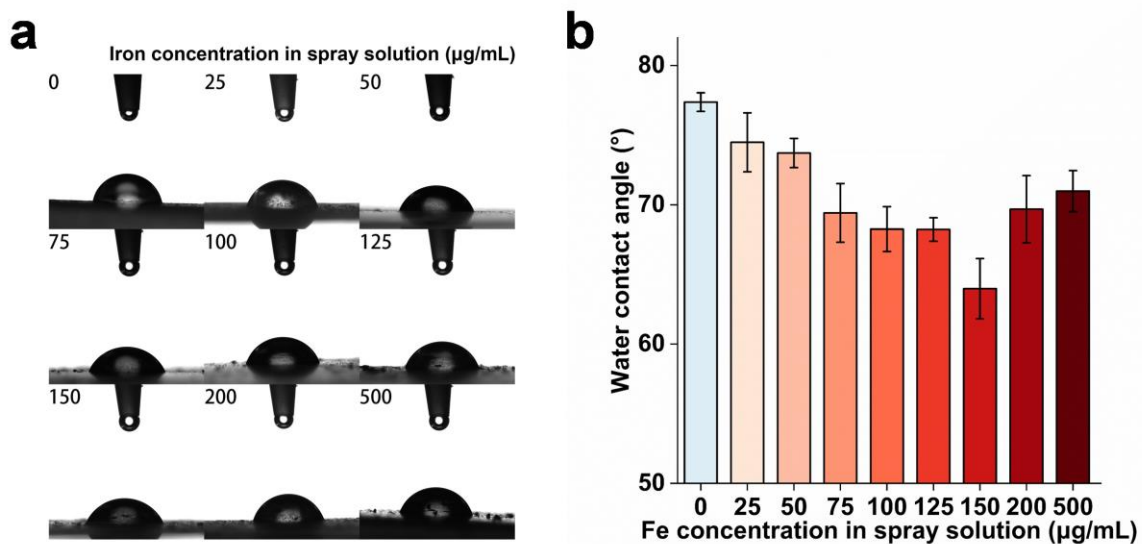

**Fig. S6** Hydrophilic characterization of stent coatings with intact gradient content of SPIONs. (a) Water contact angle images. (b) Quantitative analysis results. Error bars: mean  $\pm$  standard deviation (SD) ( $n = 3$ ).

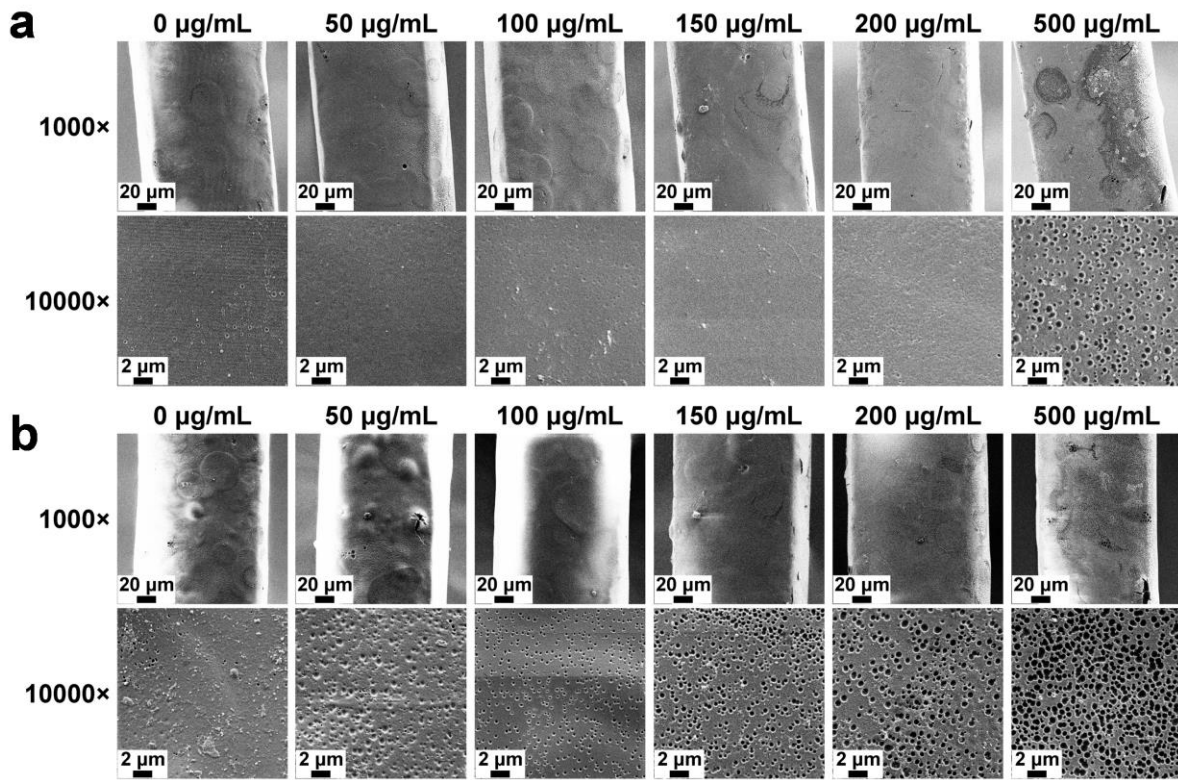

**Fig. S7** SEM images of SPION-BDS with intact concentration gradient on 14th (a) and 90th (b) days after degradation.



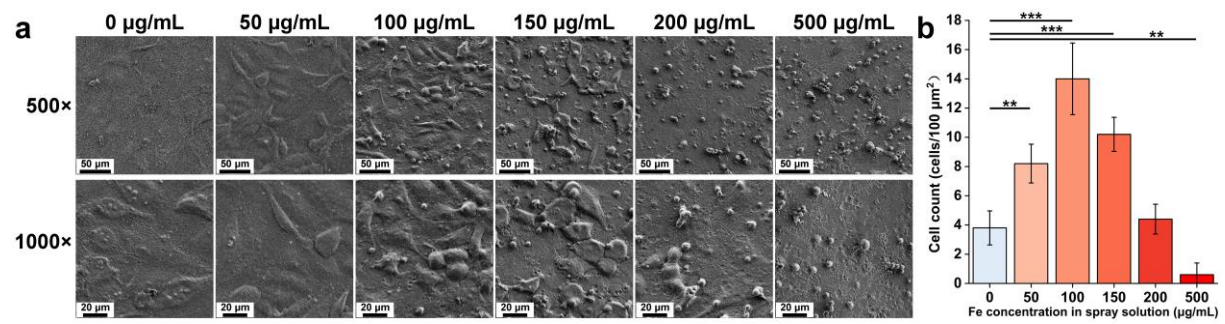

**Fig. S8** SEM characterization of HUVEC growth on SPION-BDS coating film with intact concentration gradient. Error bars: mean  $\pm$  standard deviation (SD) (n = 3). \*P < 0.05, \*\*P < 0.01, and \*\*\*P < 0.001 (two-tailed Student's t-test).
